# Supplementary material for: Adsorption of aromatics on the (111) surface of PtM and PtM3 (M = Fe, Ni) alloys
Source: Royal Society of Chemistry journal article supplement (doi:10.1039/c5ra13578h), 2015-01-01
Supplement: c5ra13578h1.pdf [file c5ra13578h1.pdf]

## Supporting Information

### Adsorption of Aromatics on the (111) Surface of PtM and PtM<sub>3</sub> (M = Fe, Ni) Alloys

*Alyssa J. R. Hensley<sup>a</sup>, Sebastian Schneider<sup>b</sup>, Yong Wang<sup>a,c</sup>, and Jean-Sabin McEwen<sup>a,d,e\*</sup>*

<sup>a</sup> The Gene & Linda Voiland School of Chemical Engineering and Bioengineering, Washington State University, Pullman WA 99164

<sup>b</sup> Universität Erlangen-Nürnberg

<sup>c</sup> Institute for Integrated Catalysis, Pacific Northwest National Laboratory, Richland, WA, 99352

<sup>d</sup> Department of Physics and Astronomy, Washington State University, Pullman, WA 99164

<sup>e</sup> Department of Chemistry, Washington State University, Pullman, WA 99164

*\*Corresponding author:* Jean-Sabin McEwen; 509-335-8580 (phone), 509-335-4806 (fax),  
js.mcewen@wsu.edu

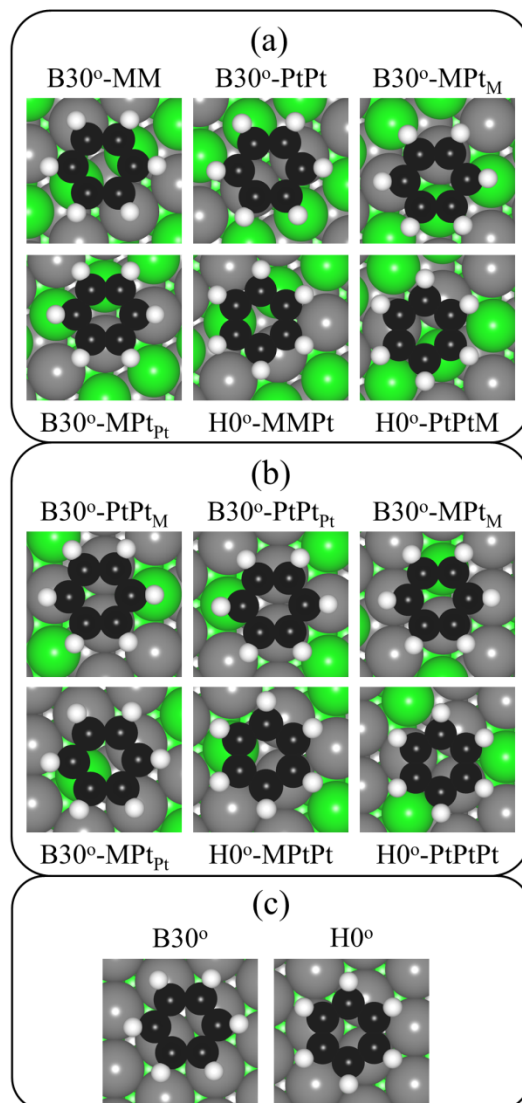

**Figure S1.** Adsorption sites for benzene on the PtM (111) surface alloys: (a) PtM, (b) Pt<sub>3</sub>M/PtM<sub>3</sub>/PtM, and (c) Pt/M/PtM. The surface sphere coloring is identical to that in Figure 1 and the black and white spheres represent carbon and hydrogen, respectively. The sites are labeled based on which surface (M or Pt) and subsurface (subscript M or Pt) species are interacting with the adsorbate (e.g. the B30°-MPtPt site has benzene bridging a surface M and Pt species with a subsurface Pt species directly below the adsorbate).

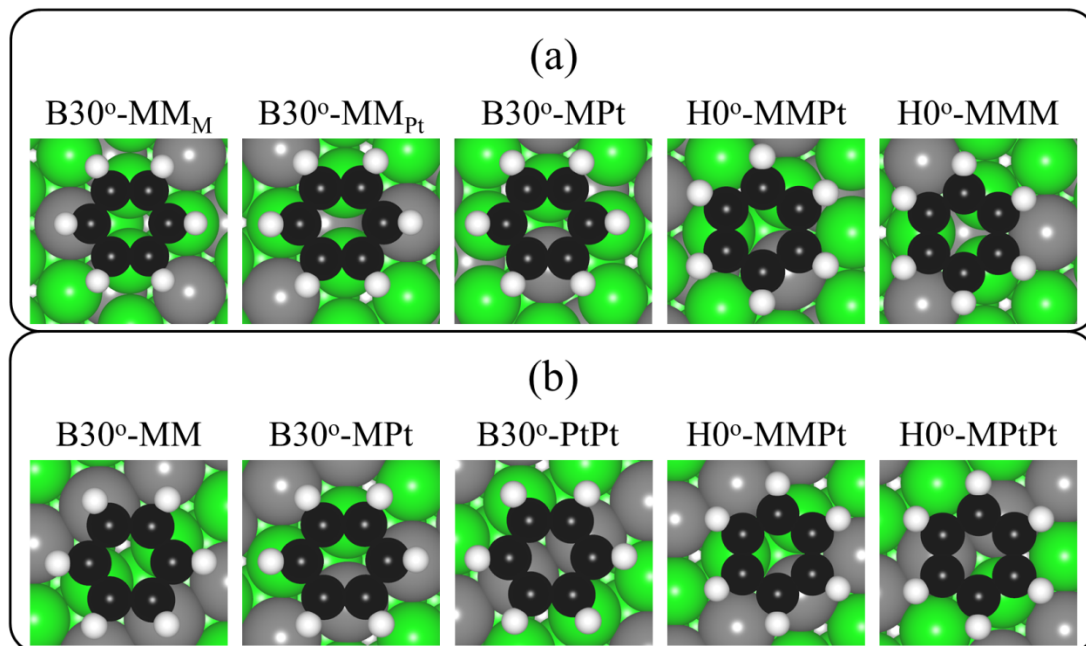

**Figure S2.** Adsorption sites for benzene on the PtM<sub>3</sub> (111) surface alloys: (a) PtM<sub>3</sub> and (b) PtM/M/PtM<sub>3</sub>. The surface sphere coloring is identical to that in Figure 1 and the black and white spheres represent carbon and hydrogen, respectively. The sites are labeled in a manner similar to that presented for Figure S1.

**Table S1.** Adsorption energy ( $E_{\text{ads}}$ ), distortion ( $E_{\text{dist}}$ ) energy, and geometric parameters for benzene adsorbed on the three most stable PtM (111) surface structures (M = Fe, Ni) in the B30° and H0° configurations with the optB88-vdW functional.<sup>a</sup>

| <b>PtFe Alloys</b>                         |                           |                       |                        |                      |                           |                      |
|--------------------------------------------|---------------------------|-----------------------|------------------------|----------------------|---------------------------|----------------------|
| Surface                                    | Site                      | $E_{\text{ads}}$ (eV) | $E_{\text{dist}}$ (eV) | $d_{\text{C-C}}$ (Å) | $\theta_{\text{C-H}}$ (°) | $d_{\text{A-M}}$ (Å) |
| PtFe                                       | B30° – FeFe               | -1.22                 | 0.87                   | 1.40, 1.45           | 14, 24                    | 2.25                 |
|                                            | B30° – PtPt               | -1.09                 | 0.34                   | 1.41, 1.43           | 9, 15                     | 2.38                 |
|                                            | B30° – FePt <sub>Fe</sub> | -1.20                 | 0.80                   | 1.42, 1.45           | 12, 18, 24                | 2.22                 |
|                                            | B30° – FePt <sub>Pt</sub> | -1.05                 | 0.75                   | 1.43, 1.44           | 14, 18, 24                | 2.26                 |
|                                            | H0° – FeFe                | -1.22                 | 0.69                   | 1.41, 1.43           | 11, 13, 16                | 2.35                 |
|                                            | H0° – PtPt                | -1.01                 | 0.44                   | 1.42, 1.45           | 16, 18                    | 2.25                 |
| Pt <sub>3</sub> Fe/PtFe <sub>3</sub> /PtFe | B30° – PtPt <sub>Fe</sub> | -0.87                 | 0.01                   | 1.40                 | 0, 1                      | 3.04                 |
|                                            | B30° – PtPt <sub>Pt</sub> |                       |                        | Unstable             |                           |                      |
|                                            | B30° – FePt <sub>Fe</sub> | -0.89                 | 0.02                   | 1.40                 | 0, 1, 2                   | 3.01                 |
|                                            | B30° – FePt <sub>Pt</sub> | -0.90                 | 0.02                   | 1.40                 | 0, 1, 2                   | 2.99                 |
|                                            | H0° – FePt                | -0.86                 | 0.02                   | 1.40                 | 0, 1                      | 3.06                 |
|                                            | H0° – Pt                  | -0.89                 | 0.02                   | 1.40                 | 0, 1, 2                   | 3.01                 |
| Pt/Fe/PtFe                                 | B30°                      | -0.854                | 0.01                   | 1.40                 | 0                         | 3.14                 |
|                                            | H0°                       | -0.853                | 0.01                   | 1.40                 | 0                         | 3.16                 |
| <b>PtNi Alloys</b>                         |                           |                       |                        |                      |                           |                      |
| Surface                                    | Site                      | $E_{\text{ads}}$ (eV) | $E_{\text{dist}}$ (eV) | $d_{\text{C-C}}$ (Å) | $\theta_{\text{C-H}}$ (°) | $d_{\text{A-M}}$ (Å) |
| PtNi                                       | B30° – NiNi               | -1.62                 | 1.24                   | 1.41, 1.46           | 16, 31                    | 2.15                 |
|                                            | B30° – PtPt               | -1.26                 | 0.96                   | 1.44, 1.45           | 15, 24                    | 2.16                 |
|                                            | B30° – NiPt <sub>Ni</sub> | -1.55                 | 1.12                   | 1.42, 1.46           | 17, 27                    | 2.14                 |
|                                            | B30° – NiPt <sub>Pt</sub> | -1.49                 | 1.13                   | 1.42, 1.46           | 16, 28                    | 2.14                 |
|                                            | H0° – NiNi                | -1.41                 | 0.76                   | 1.43, 1.46           | 17, 18                    | 2.20                 |
|                                            | H0° – PtPt                | -1.28                 | 0.67                   | 1.42, 1.45           | 16, 18                    | 2.21                 |
| Pt <sub>3</sub> Ni/PtNi <sub>3</sub> /PtNi | B30° – PtPt <sub>Ni</sub> | -0.94                 | 1.01                   | 1.44, 1.46           | 14, 25                    | 2.23                 |
|                                            | B30° – PtPt <sub>Pt</sub> | -0.81                 | 0.99                   | 1.43, 1.45           | 14, 20, 30                | 2.25                 |
|                                            | B30° – NiPt <sub>Ni</sub> | -1.01                 | 1.18                   | 1.41, 1.46           | 14, 30                    | 2.24                 |
|                                            | B30° – NiPt <sub>Pt</sub> | -0.98                 | 1.18                   | 1.41, 1.46           | 14, 30                    | 2.24                 |
|                                            | H0° – NiPt                | -0.91                 | 0.69                   | 1.42, 1.45           | 12, 15                    | 2.36                 |
|                                            | H0° – Pt                  | -0.83                 | 0.55                   | 1.43, 1.46           | 14, 17                    | 2.30                 |
| Pt/Ni/PtNi                                 | B30°                      | -0.86                 | 0.01                   | 1.40                 | 0, 1                      | 3.14                 |
|                                            | H0°                       | -0.85                 | 0.01                   | 1.40                 | 0                         | 3.15                 |

<sup>a</sup>C-C bond length,  $d_{\text{C-C}}$ ; C-H dihedral bond angle,  $\theta_{\text{C-H}}$ ; adsorbate to surface distance,  $d_{\text{A-M}}$ .

**Table S2.** Adsorption energy ( $E_{\text{ads}}$ ), distortion ( $E_{\text{dist}}$ ) energy, and geometric parameters for benzene adsorbed on the two most stable  $\text{PtM}_3$  (111) surface structures ( $M = \text{Fe}, \text{Ni}$ ) in the  $\text{B}30^\circ$  and  $\text{H}0^\circ$  configurations with the optB88-vdW functional.<sup>a</sup>

| <b>PtFe<sub>3</sub> Alloys</b> |               |                       |                        |                      |                           |                      |
|--------------------------------|---------------|-----------------------|------------------------|----------------------|---------------------------|----------------------|
| Surface                        | Site          | $E_{\text{ads}}$ (eV) | $E_{\text{dist}}$ (eV) | $d_{\text{C-C}}$ (Å) | $\theta_{\text{C-H}}$ (°) | $d_{\text{A-M}}$ (Å) |
| PtFe <sub>3</sub>              | B30° – FeFeFe |                       |                        | Unstable             |                           |                      |
|                                | B30° – FeFePt | -1.32                 | 0.86                   | 1.43, 1.46           | 13, 19, 27                | 2.24                 |
|                                | B30° – FePt   | -1.33                 | 1.08                   | 1.44, 1.45           | 12, 21, 27                | 2.15                 |
|                                | H0° – FeFePt  | -1.01                 | 0.35                   | 1.41, 1.44           | 11, 12                    | 2.41                 |
|                                | H0° – FeFeFe  | -1.37                 | 0.80                   | 1.44, 1.45           | 17, 19                    | 2.21                 |
| PtFe/Fe/PtFe <sub>3</sub>      | B30° – FeFe   | -0.86                 | 0.01                   | 1.40                 | 0, 1                      | 3.11                 |
|                                | B30° – FePt   | -0.86                 | 0.01                   | 1.40                 | 0, 2                      | 3.01                 |
|                                | B30° – PtPt   | -0.83                 | 0.03                   | 1.40                 | 0, 1                      | 3.03                 |
|                                | H0° – FeFePt  | -0.84                 | 0.02                   | 1.40                 | 0, 1                      | 3.06                 |
|                                | H0° – FePtPt  | -0.85                 | 0.01                   | 1.40                 | 0, 1                      | 3.05                 |
| <b>PtNi<sub>3</sub> Alloys</b> |               |                       |                        |                      |                           |                      |
| Surface                        | Site          | $E_{\text{ads}}$ (eV) | $E_{\text{dist}}$ (eV) | $d_{\text{C-C}}$ (Å) | $\theta_{\text{C-H}}$ (°) | $d_{\text{A-M}}$ (Å) |
| PtNi <sub>3</sub>              | B30° – NiNiNi | -1.59                 | 0.99                   | 1.42, 1.45           | 16, 26                    | 2.14                 |
|                                | B30° – NiNiPt | -1.59                 | 1.05                   | 1.42, 1.45           | 16, 27                    | 2.14                 |
|                                | B30° – NiPt   | -1.43                 | 0.93                   | 1.43, 1.45           | 16, 24                    | 2.13                 |
|                                | H0° – NiNiPt  | -1.37                 | 0.71                   | 1.42, 1.45           | 17                        | 2.19                 |
|                                | H0° – NiNiNi  | -1.43                 | 0.70                   | 1.42, 1.45           | 16, 17                    | 2.18                 |
| PtNi/Ni/PtNi <sub>3</sub>      | B30° – NiNi   | -0.90                 | 1.04                   | 1.41, 1.46           | 13, 28                    | 2.27                 |
|                                | B30° – NiPt   | -0.78                 | 0.90                   | 1.42, 1.45           | 14, 25                    | 2.25                 |
|                                | B30° – PtPt   | -0.57                 | 0.68                   | 1.43, 1.44           | 13, 20                    | 2.27                 |
|                                | H0° – NiNiPt  | -0.66                 | 0.51                   | 1.42, 1.45           | 13, 15                    | 2.34                 |
|                                | H0° – NiPtPt  | -0.72                 | 0.53                   | 1.42, 1.45           | 13, 15                    | 2.35                 |

<sup>a</sup>C-C bond length,  $d_{\text{C-C}}$ ; C-H dihedral bond angle,  $\theta_{\text{C-H}}$ ; adsorbate to surface distance,  $d_{\text{A-M}}$ .

**Table S3.** Adsorption energy ( $E_{\text{ads}}$ ), distortion ( $E_{\text{dist}}$ ) energy, and geometric parameters for phenol adsorbed on the three most stable PtM (111) surfaces and two most stable PtM<sub>3</sub> (111) surfaces (M = Fe, Ni). Both horizontal and vertical adsorption sites are shown and the calculations were performed with the optB88-vdW functional.<sup>a</sup>

| <b>Horizontal Adsorption Sites</b>         |                       |                        |                      |                      |                                |                      |
|--------------------------------------------|-----------------------|------------------------|----------------------|----------------------|--------------------------------|----------------------|
| Surface                                    | $E_{\text{ads}}$ (eV) | $E_{\text{dist}}$ (eV) | $d_{\text{C-C}}$ (Å) | $d_{\text{C-O}}$ (Å) | $\theta_{\text{Dihedral}}$ (°) | $d_{\text{A-M}}$ (Å) |
| PtFe                                       | -1.29                 | 1.10                   | 1.40, 1.46           | 1.36                 | 15, 26                         | 2.28                 |
| PtNi                                       | -1.66                 | 1.39                   | 1.41, 1.47           | 1.36                 | 17, 32                         | 2.18                 |
| Pt <sub>3</sub> Fe/PtFe <sub>3</sub> /PtFe | -1.02                 | 0.02                   | 1.40                 | 1.37                 | 1, 2                           | 3.05                 |
| Pt <sub>3</sub> Ni/PtNi <sub>3</sub> /PtNi | -1.03                 | 1.22                   | 1.41, 1.46           | 1.37                 | 15, 30                         | 2.27                 |
| Pt/Fe/PtFe                                 | -1.00                 | 0.01                   | 1.40                 | 1.37                 | 0, 1                           | 3.11                 |
| Pt/Ni/PtNi                                 | -1.00                 | 0.01                   | 1.40                 | 1.36                 | 0, 2                           | 3.13                 |
| PtFe <sub>3</sub>                          |                       |                        | Unstable             |                      |                                |                      |
| PtNi <sub>3</sub>                          | -1.62                 | 1.11                   | 1.42, 1.45           | 1.37                 | 17, 28                         | 2.15                 |
| PtFe/Fe/PtFe <sub>3</sub>                  | -1.05                 | 0.05                   | 1.40                 | 1.36                 | 2, 4                           | 3.00                 |
| PtNi/Ni/PtNi <sub>3</sub>                  | -0.92                 | 1.09                   | 1.40, 1.46           | 1.36                 | 14, 28                         | 2.30                 |
| <b>Vertical Adsorption Sites - M</b>       |                       |                        |                      |                      |                                |                      |
| Surface                                    | $E_{\text{ads}}$ (eV) | $E_{\text{dist}}$ (eV) | $d_{\text{C-C}}$ (Å) | $d_{\text{C-O}}$ (Å) | $\theta_{\text{Dihedral}}$ (°) | $d_{\text{A-M}}$ (Å) |
| PtFe                                       | -0.73                 | 0.04                   | 1.40                 | 1.40                 | 1                              | 2.26                 |
| PtNi                                       | -0.66                 | 0.02                   | 1.40                 | 1.39                 | 1                              | 2.26                 |
| Pt <sub>3</sub> Fe/PtFe <sub>3</sub> /PtFe | -0.69                 | 0.01                   | 1.40                 | 1.39                 | 0, 1                           | 2.36                 |
| Pt <sub>3</sub> Ni/PtNi <sub>3</sub> /PtNi | -0.61                 | 0.01                   | 1.40                 | 1.39                 | 0, 1                           | 2.36                 |
| Pt/Fe/PtFe                                 |                       |                        |                      | -                    |                                |                      |
| Pt/Ni/PtNi                                 |                       |                        |                      | -                    |                                |                      |
| PtFe <sub>3</sub>                          | -0.78                 | 0.02                   | 1.40                 | 1.40                 | 1                              | 2.36                 |
| PtNi <sub>3</sub>                          | -0.61                 | 0.02                   | 1.40                 | 1.39                 | 0, 1                           | 2.27                 |
| PtFe/Fe/PtFe <sub>3</sub>                  | -0.68                 | 0.02                   | 1.40                 | 1.39                 | 0, 1                           | 2.44                 |
| PtNi/Ni/PtNi <sub>3</sub>                  | -0.54                 | 0.01                   | 1.40                 | 1.39                 | 0, 1                           | 2.35                 |
| <b>Vertical Adsorption Sites - Pt</b>      |                       |                        |                      |                      |                                |                      |
| Surface                                    | $E_{\text{ads}}$ (eV) | $E_{\text{dist}}$ (eV) | $d_{\text{C-C}}$ (Å) | $d_{\text{C-O}}$ (Å) | $\theta_{\text{Dihedral}}$ (°) | $d_{\text{A-M}}$ (Å) |
| PtFe                                       | -0.46                 | 0.02                   | 1.40                 | 1.39                 | 0, 2                           | 2.59                 |
| PtNi                                       | -0.47                 | 0.01                   | 1.40                 | 1.39                 | 0, 1                           | 2.54                 |
| Pt <sub>3</sub> Fe/PtFe <sub>3</sub> /PtFe | -0.45                 | 0.00                   | 1.40                 | 1.39                 | 0, 1                           | 2.69                 |
| Pt <sub>3</sub> Ni/PtNi <sub>3</sub> /PtNi | -0.48                 | 0.01                   | 1.40                 | 1.38                 | 0, 1                           | 2.63                 |
| Pt/Fe/PtFe                                 | -0.46                 | 0.00                   | 1.40                 | 1.38                 | 0, 1                           | 2.63                 |
| Pt/Ni/PtNi                                 | -0.46                 | 0.00                   | 1.40                 | 1.38                 | 0, 2                           | 2.70                 |
| PtFe <sub>3</sub>                          | -0.40                 | 0.00                   | 1.40                 | 1.38                 | 0, 2                           | 2.71                 |
| PtNi <sub>3</sub>                          | -0.45                 | 0.00                   | 1.40                 | 1.38                 | 0, 2                           | 2.63                 |
| PtFe/Fe/PtFe <sub>3</sub>                  | -0.43                 | 0.00                   | 1.40                 | 1.38                 | 0, 1                           | 2.76                 |
| PtNi/Ni/PtNi <sub>3</sub>                  | -0.44                 | 0.00                   | 1.40                 | 1.38                 | 0, 2                           | 2.71                 |

<sup>a</sup>C-C bond length,  $d_{\text{C-C}}$ ; C-O bond length,  $d_{\text{C-O}}$ ; C-H and C-O dihedral bond angles,  $\theta_{\text{Dihedral}}$ ; adsorbate to surface distance,  $d_{\text{A-M}}$ .

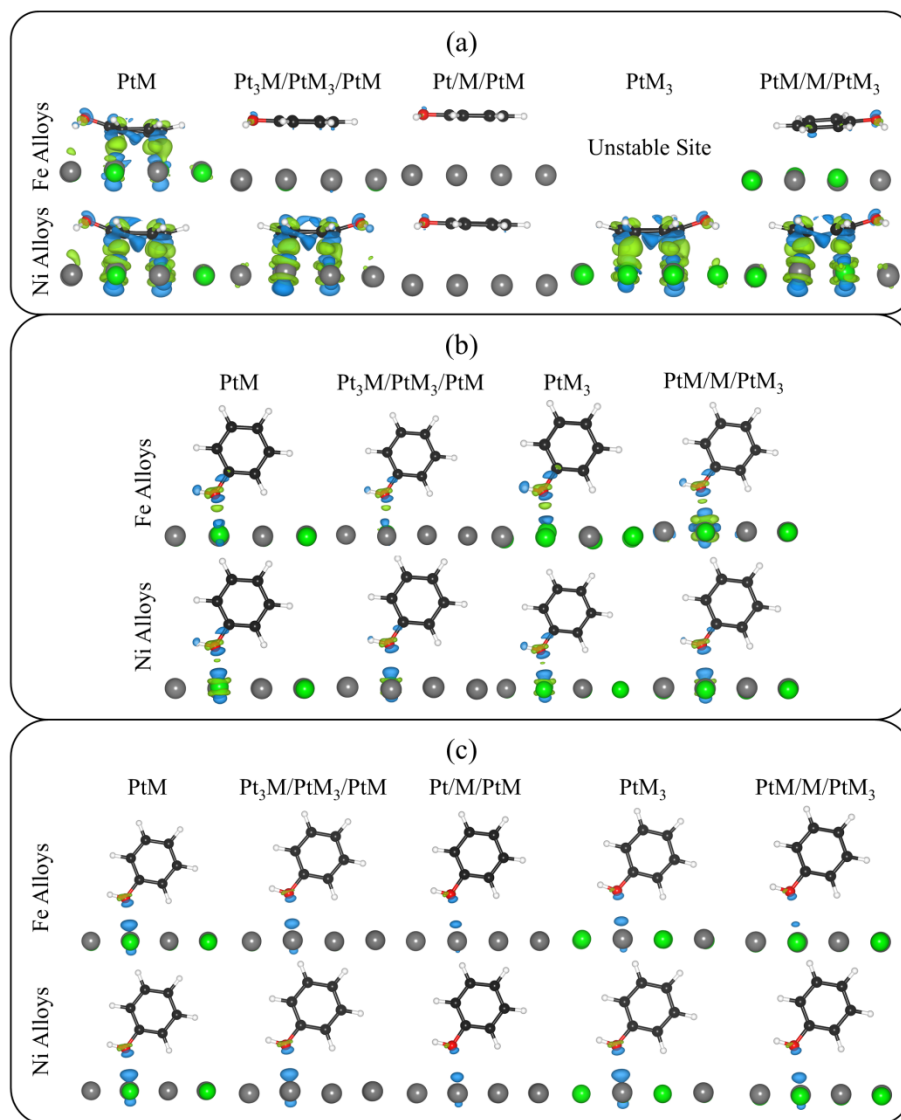

**Figure S3.** Differential charge density distributions for phenol in all of the studied sites on the PtM and PtM<sub>3</sub> (111) surfaces. The horizontal adsorption sites (a), vertical adsorption sites atop a surface M species (b), and vertical adsorption sites atop a surface Pt species (c) are shown. The surface sphere coloring is identical to that in Figure 1 and the black, white, and red spheres represent carbon, hydrogen, and oxygen, respectively. The isosurface level was set to 0.005 electrons/Bohr<sup>3</sup> and the green and blue areas represent a gain and loss of electrons. The calculations were performed using the optB88-vdW functional.
